# Supplementary material for: Sepsis and septic shock after craniotomy: Predicting a significant patient safety and quality outcome measure
Source: PubMed Central journal article supplement (PMC7498000; doi:10.1371/journal.pone.0235273), 2020-09-17
Supplement: pone.0235273.s002.pdf [file pone.0235273.s002.pdf]

## APPROVAL OF MODIFICATION

March 25, 2019

The RSRB approved the following submission on 3/25/2019. This approval is effective as of 3/25/2019.

This study is approved until to 11/26/2019 inclusive.

|                       |                                                                                                      |
|-----------------------|------------------------------------------------------------------------------------------------------|
| Type of Review:       | Modification                                                                                         |
| Title:                | Clinical outcome and Complication Prediction of Brain and Spine Surgery Using Machine Learning Model |
| Investigator:         | Yan Li                                                                                               |
| Submission ID:        | <a href="#">MOD00001710</a>                                                                          |
| Funding:              | None                                                                                                 |
| Groups Notified:      | Subjects do not need to be notified, or no local subject enrollment                                  |
| Notification Methods: | None                                                                                                 |
| Documents Approved:   | Protocol v8.pdf                                                                                      |

As the Principal Investigator, you are responsible for ensuring compliance with [Policy 901 Investigator Responsibilities](#). Also, any unanticipated problems involving risks to subjects or others (including unexpected deaths, hospitalizations or serious injuries, breach of confidentiality, loss of privacy) must be reported according to [Policy 801 Reporting Research Events](#).
