# Supplementary material for: Sepsis and septic shock after craniotomy: Predicting a significant patient safety and quality outcome measure
Source: PubMed Central journal article supplement (PMC7498000; doi:10.1371/journal.pone.0235273), 2020-09-17
Supplement: pone.0235273.s004.pdf [file pone.0235273.s004.pdf]

## APPROVAL

November 27, 2018

The RSRB approved the following submission from 11/27/2018 to 11/26/2019 inclusive. This approval is effective as of 11/27/2018.

|                              |                                                                                                      |
|------------------------------|------------------------------------------------------------------------------------------------------|
| Type of Review:              | Initial Study                                                                                        |
| Title:                       | Clinical outcome and Complication Prediction of Brain and Spine Surgery Using Machine Learning Model |
| Investigator:                | Yan Li                                                                                               |
| Study ID:                    | <a href="#">STUDY00003122</a>                                                                        |
| Funding:                     | None                                                                                                 |
| Regulatory Findings Consent: | Waiver or alteration of consent process                                                              |
| Regulatory Findings HIPAA:   | Waiver or alteration of HIPAA                                                                        |
| Documents Reviewed:          | Protocol.pdf                                                                                         |

This study was reviewed and approved under the OHSP and UR policies, and in accordance with Federal regulation 45 CFR 46 under the University's Federal-wide Assurance (FWA00009386). As the Principal Investigator, you are responsible for ensuring compliance with [Policy 901 Investigator Responsibilities](#). Click here for the [Summary of Responsibilities for Investigators Conducting Non-FDA Regulated Research](#). Also, any unanticipated problems involving risks to subjects or others (including unexpected deaths, hospitalizations or serious injuries, breach of confidentiality, loss of privacy) must be reported according to [Policy 801 Reporting Research Events](#).
